# Supplementary material for: Chirally self-assembled porphyrin nanowires assisted by L-glutamide-derived lipid for excitation energy transfer
Source: Royal Society of Chemistry journal article supplement (doi:10.1039/b818358a), 2009-01-01
Supplement: b818358a.pdf [file b818358a.pdf]

### Supplementary Information

## Chirally self-assembled porphyrin nanowires assisted by L-glutamide-derived lipid for excitation energy transfer

Hirokuni Jintoku,<sup>a</sup> Takashi Sagawa,<sup>b</sup> Makoto Takafuji,<sup>a</sup> and Hiroataka Ihara<sup>a\*</sup>

<sup>a</sup>Department of Applied Chemistry and Biochemistry, Kumamoto University, Kumamoto-shi, Kumamoto 860-8555, Japan

<sup>b</sup>Institute of Advanced Energy, Kyoto University, Uji 611-0011, Japan

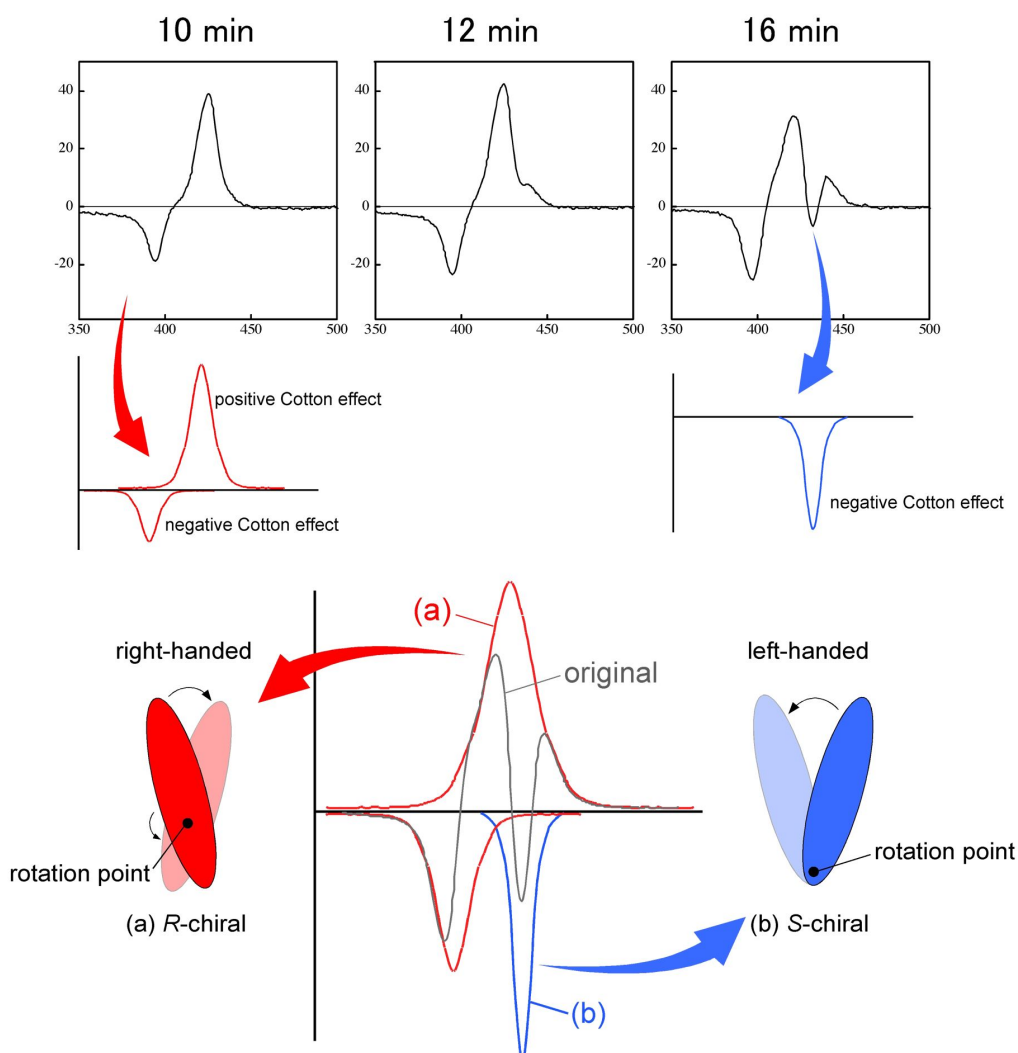

**Fig. S1** Resolution of CD spectrum of the 0.2 mM **1** in a cyclohexane-THF (20 : 1) mixture at 10 °C.

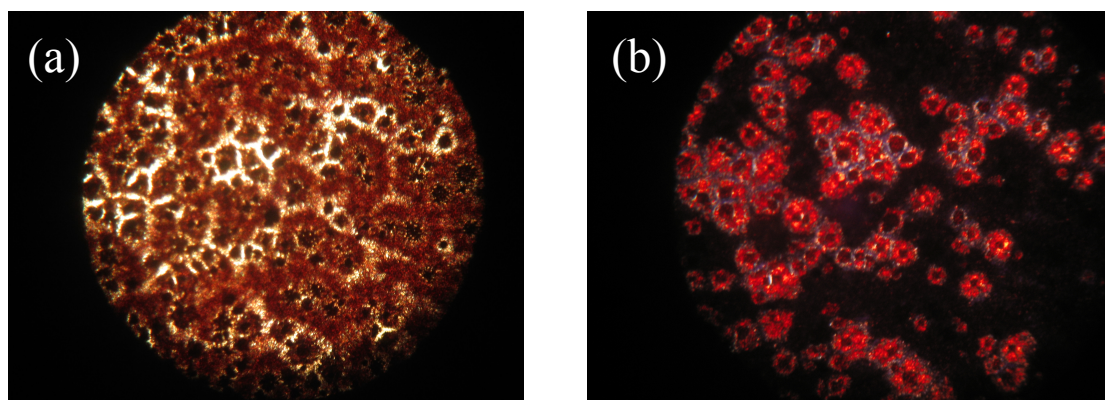

**Fig. S2** Optical (a) and polarized (b) micrograph images of cast film of **3** on glass substrate prepared from dichlorobenzene solution after annealing at 210°C for 10 min.

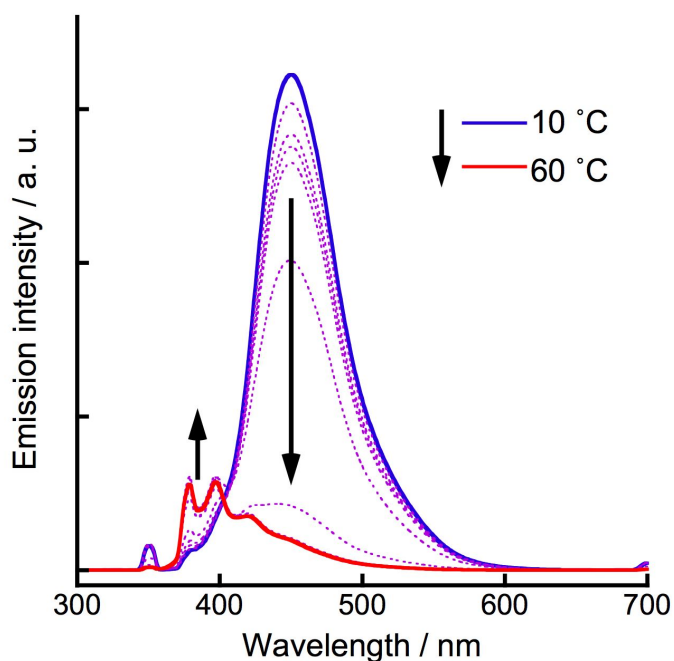

**Fig. S3** Temperature dependent fluorescence spectra of **3** (0.05 mM) in a cyclohexane-THF (20 : 1) mixture. Excitation wavelength was 350 nm. The arrows indicate the temperature rose from 10 °C (blue line) to 60 °C (red line.)

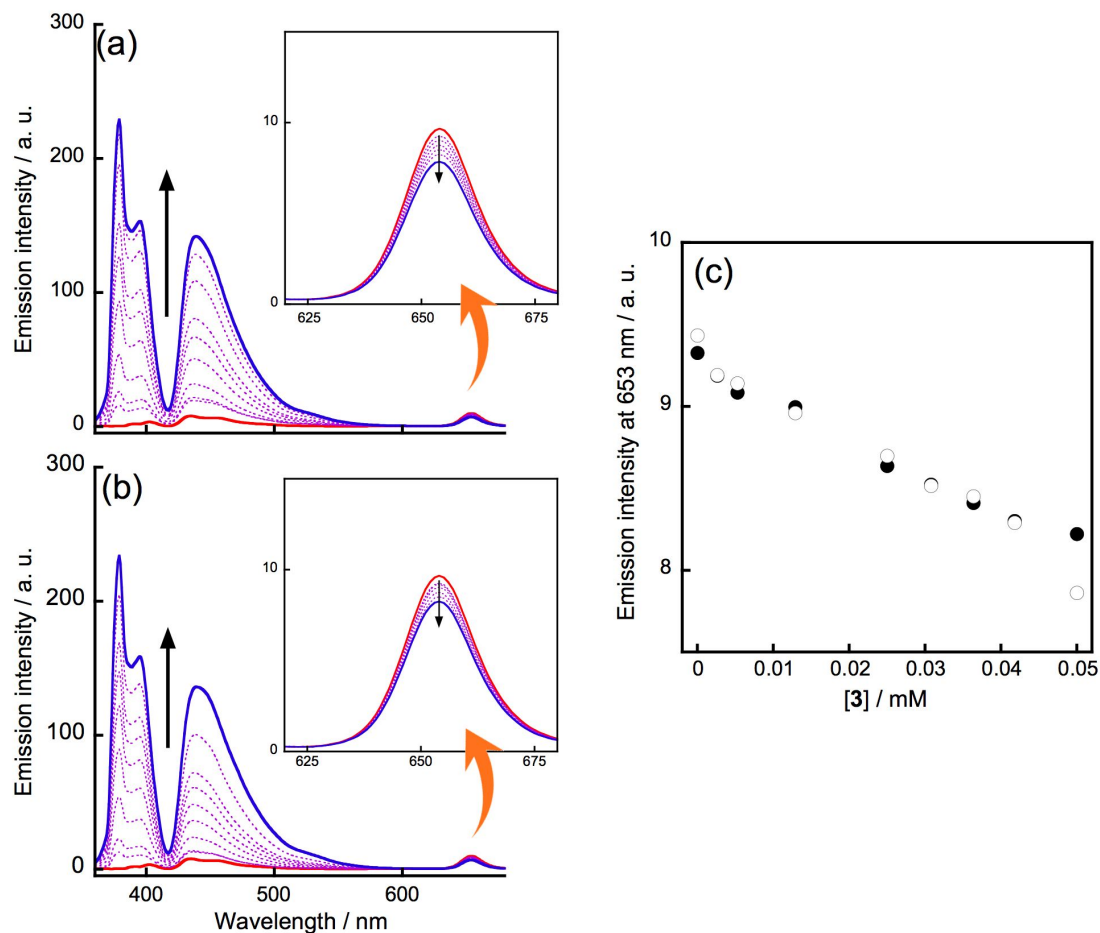

**Fig. S4** Fluorescence spectra of mixture containing 0.01 mM of **1** and 0 to 0.05 mM of **3** (a), and 0.01 mM of MCTPP and 0 to 0.05 mM of **3** (b) in a cyclohexane-THF (20 : 1) mixture at 60 °C. The arrows indicate increasing the concentration of **3** from 0 mM (red line) to 0.05 mM (blue line). Excitation wavelength was 350 nm. Emission intensities at 653 nm (c) of **3** and 0.01 mM of **1** (●) or **3** and 0.01 mM of MCTPP (○).

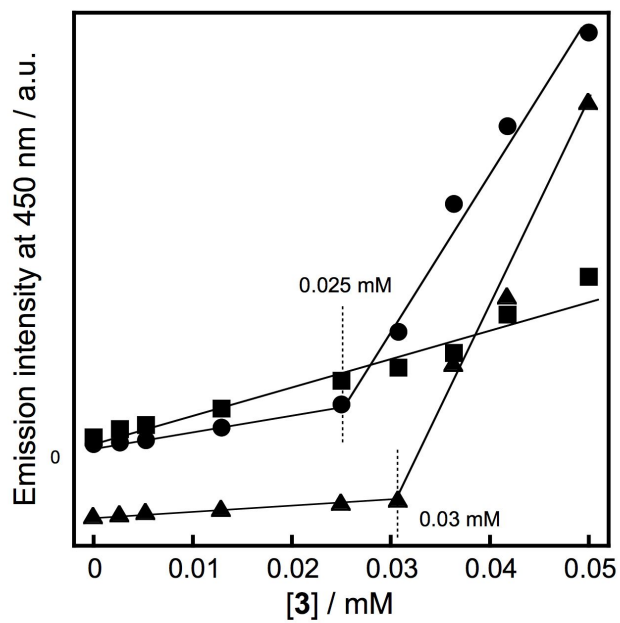

**Fig. S5** Emission intensities at 450 nm of mixture of **3** and 0.01 mM of **1** (●), **3** and 0.01 mM of MCTPP (■), and **3** (▲) at 10 °C.
